# Supplementary material for: An allergenic plant calmodulin from Artemisia pollen primes human DCs leads to Th2 polarization
Source: Front Immunol. 2022 Sep 29;13:996427. doi: 10.3389/fimmu.2022.996427 (PMC9556433; doi:10.3389/fimmu.2022.996427)
Supplement: Supplementary file 2 [file Table_1.xlsx]

## Sheet: Fig 3A
	CaM induced DCs maturation
			ID	Control	CaM50nM	CaM100nM	CaM200nM
	Fluorescence Intensity (A.U.)	CD86	1	8954	28109	31394	31387
			2	2303	4734	8356	8983
			3	9321	30610	31775	26916
		CD80	1	5522	16171	20214	19969
			2	5060	8098	11791	17995
			3	7658	18382	17749	24556
		HLA-DR	1	4353	11887	14639	14298
			2	5394	12385	13041	16757
			3	91618	224666	228408	239078
	Folds Change compared control	CD86	1	1	3.13927	3.50614	3.50536
			2	1	2.05558	3.62831	3.90056
			3	1	3.28398	3.40897	2.88767
		CD80	1	1	2.92847	3.66063	3.61626
			2	1	1.6004	2.33024	3.55632
			3	1	2.40037	2.31771	3.20658
		HLA-DR	1	1	2.73076	3.36297	3.28463
			2	1	2.29607	2.41769	3.1066
			3	1	2.4522	2.49305	2.60951

## Sheet: Fig 3C
				cDCs					pDCs
			ID	CON	IgE	CaM	CaM + IgE	LPS	CON	IgE	CaM	CaM + IgE	LPS
	Fluorescence Intensity (A.U.)	CD86	1	3992	3429	38381	35438	36613	42.3	35.3	589	666	478
			2	3564	3197	37211	34804	34975	1019	1219	14147	15734	13194
			3	3952	3197	37419	34775	35693	946	1142	15970	17951	13182
		CD80	1	5648	6086	19947	19779	20998	286	269	783	914	741
			2	5567	5782	19513	19089	20141	4526	7019	13193	21079	17714
			3	5785	5782	19861	19021	20733	6117	7601	20868	24341	19918
		HLA-DR	1	17806	16926	26652	29970	21259	477	771	2167	2806	2079
			2	19886	17490	28472	30929	22372	45921	70044	124849	220889	182690
			3	19006	17490	26737	28487	22626	13496	12912	58368	75213	57200
	Folds Change compared control	CD86	1	1	0.858968	9.61448	8.87725	9.17159	1	0.834515	13.9243	15.7447	11.3002
			2	1	0.897026	10.4408	9.76543	9.81341	1	1.19627	13.8832	15.4406	12.948
			3	1	0.808957	9.46837	8.79934	9.03163	1	1.20719	16.8816	18.9757	13.9345
		CD80	1	1	1.07755	3.53169	3.50195	3.71778	1	0.940559	2.73776	3.1958	2.59091
			2	1	1.03862	3.50512	3.42896	3.61793	1	1.55082	2.91494	4.65731	3.91383
			3	1	0.999481	3.43319	3.28799	3.58392	1	1.2426	3.41148	3.97924	3.25617
		HLA-DR	1	1	0.950578	1.4968	1.68314	1.19392	1	1.61635	4.54298	5.8826	4.35849
			2	1	0.879513	1.43176	1.55532	1.12501	1	1.52532	2.71878	4.8102	3.97835
			3	1	0.920236	1.40677	1.49884	1.19047	1	0.956728	4.32484	5.57298	4.23829

## Sheet: Fig4B
				Il-5（pg/ml）
	OD1	OD2	average value	adjusted value	computed value	Dilution multiple	IL-5（pg/ml）
Control	0.029	0.03	0.0295	0.0265	4.71792	1.5	7.07688
	0.011	0.012	0.0115	0.0085	1.50657	1.5	2.25986
	0.011	0.015	0.013	0.01	1.68571	1.5	2.52857
	0.036	0.019	0.0275	0.0245	4.36247	1.5	6.54371
	0.016	0.015	0.0155	0.0125	2.22261	1.5	3.33392
pIgE	0.021	0.046	0.0335	0.0305	5.4278	1.5	8.1417
	0.024	0.037	0.0305	0.0275	4.89552	1.5	7.34327
	0.055	0.033	0.044	0.041	7.28484	1.5	10.9273
	0.024	0.052	0.038	0.035	6.2248	1.5	9.3372
ArtCaM	0.031	0.036	0.0335	0.0305	5.4278	1.5	8.1417
	0.039	0.038	0.0385	0.0355	6.2976	1.5	9.44635
	0.013	0.019	0.016	0.013	2.22261	1.5	3.33392
	0.028	0.031	0.0295	0.0265	4.71792	1.5	7.07688
	0.074	0.039	0.0565	0.0535	9.65903	1.5	14.4885
	0.076	0.033	0.0545	0.0515	9.13273	1.5	13.6991
	0.044	0.037	0.0405	0.0375	6.75519	1.5	10.1328
	0.018	0.011	0.0145	0.0115	2.13319	1.5	3.19978
	0.024	0.034	0.029	0.026	4.62909	1.5	6.94363
	0.041	0.027	0.034	0.031	5.60506	1.5	8.40759
	0.029	0.053	0.041	0.038	5.16175	1.5	10.1328
ArtCaM+pIgE	0.13	0.098	0.114	0.111	19.4375	1.5	29.1563
	0.031	0.02	0.0255	0.0225	4.00669	1.5	6.01003
	0.064	0.131	0.0975	0.0945	16.5215	1.5	24.7822
	0.015	0.018	0.0165	0.0135	2.40141	1.5	3.60211
	0.029	0.035	0.032	0.029	5.16175	1.5	7.74263
	0.109	0.108	0.1085	0.1055	18.3524	1.5	27.5286
	0.027	0.047	0.037	0.034	6.04784	1.5	9.07176
	0.096	0.065	0.0805	0.0775	13.6699	1.5	20.5049
	0.156	0.185	0.1705	0.1675	28.975	1.5	43.4625
LPS	0.012	0.022	0.017	0.014	2.49077	1.5	3.73616
	0.026	0.012	0.019	0.016	2.84802	1.5	4.27202
	0.012	0.012	0.0119	0.0089	1.5733	1.5	2.35648

## Sheet: Fig4C
IL-6（pg/ml）
	OD1	OD2	average value	adjusted value	computed value	Dilution multiple	IL-6（pg/ml）
Control	0.424	0.408	0.416	0.413	59.3826	3	178.148
	0.35	0.328	0.339	0.336	49.0531	3	147.159
	0.599	0.593	0.596	0.593	83.804	3	251.412
	0.11	0.107	0.1085	0.1055	16.8319	3	50.4958
	0.169	0.171	0.17	0.167	25.8499	3	77.5497
	0.169	0.144	0.1565	0.1535	23.9794	3	71.9382
pIgE	0.097	0.117	0.107	0.104	16.5232	3	49.5695
	0.096	0.086	0.091	0.088	14.0091	3	42.0273
	0.057	0.053	0.055	0.052	7.93123	3	23.7937
	0.043	0.036	0.0395	0.0365	5.082	3	15.246
ArtCaM	0.738	0.716	0.727	0.727	51.197	100	5119.7
	1.327	1.244	1.2855	1.2825	192.888	3	578.663
	0.485	0.472	0.4785	0.4785	34.0895	100	3408.95
	0.725	0.773	0.749	0.746	105.37	3	316.11
	0.396	0.419	0.4075	0.4075	29.2206	100	2922.06
	0.451	0.436	0.4435	0.4435	31.6905	100	3169.05
	0.437	0.437	0.437	0.437	31.2105	100	3121.05
	0.915	0.825	0.87	0.87	61.2782	100	6127.82
ArtCaM+pIgE	1.352	1.33	1.341	1.338	203.361	3	610.082
	0.449	0.436	0.4425	0.4425	31.6219	100	3162.19
	0.694	0.735	0.7145	0.7115	100.49	3	301.469
	0.389	0.381	0.385	0.385	27.64	100	2764
	0.476	0.407	0.4415	0.4415	31.5533	100	3155.33
	1.15	1.197	1.1735	1.1705	172.601	3	517.804
	1.504	1.51	1.507	1.504	237.345	3	712.035
LPS	1.821	1.835	1.828	1.828	137.897	100	13789.7
	1.801	1.801	1.801	1.801	135.392	100	13539.2
	1.475	1.465	1.47	1.47	106.929	100	10692.9

## Sheet: Fig4D
IL-10（pg/ml）
	OD1	OD2	average value	adjusted value	computed value	Dilution multiple	IL-10（pg/ml）
Control	0.242	0.222	0.232	0.228	46.5485	1.5	69.8227
	0.154	0.147	0.1505	0.1465	30.7842	1.5	46.1763
	0.102	0.097	0.0995	0.0955	20.7953	1.5	31.1929
	0.078	0.081	0.0795	0.0755	16.8287	1.5	25.243
	0.165	0.174	0.1695	0.1655	34.4749	1.5	51.7123
pIgE	0.109	0.094	0.1015	0.0975	21.19	1.5	31.785
	0.012	0.017	0.0145	0.0105	3.48272	1.5	5.22408
	0.159	0.156	0.1575	0.1535	32.1454	1.5	48.2181
	0.013	0.014	0.0135	0.0095	3.26543	1.5	4.89814
ArtCaM	1.008	0.959	0.9835	0.9795	193.987	1.5	290.98
	1.354	1.257	1.3055	1.3015	261.217	1.5	391.825
	0.294	0.288	0.291	0.287	57.8965	1.5	86.8447
	1.246	1.261	1.2535	1.2495	250.14	1.5	375.21
	0.025	0.042	0.0335	0.0295	7.50249	1.5	11.2537
	0.281	0.218	0.2495	0.2455	49.9174	1.5	74.8761
	0.835	0.78	0.8075	0.8035	158.49	1.5	237.735
	0.86	0.764	0.812	0.808	159.388	1.5	239.081
	1.094	1.054	1.074	1.07	212.565	1.5	318.848
	0.316	0.306	0.311	0.307	61.7393	1.5	92.6089
ArtCaM+pIgE	0.103	0.125	0.114	0.11	23.6507	1.5	35.4761
	0.037	0.035	0.036	0.032	8.02066	1.5	12.031
	0.109	0.108	0.1085	0.1045	22.5693	1.5	33.854
	0.043	0.052	0.0475	0.0435	10.3829	1.5	15.5743
	0.082	0.083	0.0825	0.0785	17.4261	1.5	26.1391
	0.122	0.125	0.1235	0.1195	25.5141	1.5	38.2711
LPS	1.971	1.933	1.952	1.948	407.232	1.5	610.848
	1.032	1.031	1.0316	2.0592	434.087	1.5	651.13
	1.901	1.9	1.9007	1.8967	395.042	1.5	592.563

## Sheet: Fig4E
IL-12（pg/ml）
	OD1	OD2	average value	adjusted value	computed value	Dilution multiple	IL-12（pg/ml）
Control	0.027	0.028	0.0275	0.0085	9.92988	1.5	14.8948
	0.025	0.024	0.0245	0.0055	8.11933	1.5	12.179
	0.025	0.026	0.0255	0.0065	8.72204	1.5	13.0831
	0.025	0.024	0.0245	0.0055	8.11933	1.5	9.92464
	0.024	0.025	0.0245	0.0055	8.11933	1.5	12.179
	0.023	0.024	0.0235	0.0045	7.51749	1.5	11.2762
	0.025	0.026	0.0255	0.0065	8.72204	1.5	13.0831
pIgE	0.029	0.03	0.0295	0.0105	11.1408	5	16.7111
	0.028	0.028	0.028	0.009	10.2323	1.5	15.3485
	0.027	0.028	0.0275	0.0085	9.92988	1.5	14.8948
	0.024	0.026	1.5	1.5	1.5	1.5	12.6309
ArtCaM	0.041	0.041	0.041	0.022	18.1545	1.5	27.2318
	0.025	0.024	0.0245	0.0055	8.11933	1.5	12.179
	0.042	0.037	0.0395	0.0205	17.2352	1.5	25.8527
	0.024	0.023	0.0235	0.0045	7.51749	1.5	11.2762
	0.026	0.027	0.0265	0.0075	9.32556	1.5	13.9883
	0.035	0.036	0.0355	0.0165	14.7899	1.5	22.1849
	0.038	0.039	0.0385	0.0195	16.623	1.5	24.9345
	0.038	0.036	0.037	0.018	15.7058	1.5	23.5587
	0.048	0.05	0.049	0.03	23.0784	1.5	34.6176
	0.029	0.031	0.03	0.011	11.4439	1.5	17.1659
	0.033	0.036	0.0345	0.0155	14.1801	1.5	21.2702
ArtCaM+pIgE	0.025	0.027	0.026	0.007	9.0391	1.5	13.5587
	0.028	0.029	0.0285	0.0095	10.535	1.5	15.8024
	0.027	0.029	0.028	0.009	10.2323	1.5	15.3485
	0.023	0.027	0.025	0.006	8.42058	1.5	12.6309
	0.028	0.029	0.0285	0.0095	10.535	1.5	15.8024
	0.025	0.024	0.0245	0.0055	8.11933	1.5	12.179
	0.027	0.028	0.0275	0.0085	9.92988	1.5	14.8948
	0.027	0.026	0.0265	0.0075	9.32556	1.5	13.9883
	0.033	0.033	0.033	0.014	13.2666	1.5	19.8999
LPS	0.038	0.039	0.0385	0.0195	16.623	1.5	24.9345
	0.033	0.034	0.0335	0.0145	13.5709	1.5	20.3564
	0.024	0.023	0.0286	0.0096	10.5977	1.5	15.8966

## Sheet: Fig4F
IL-13（pg/ml）
	OD1	OD2	average value	adjusted value	computed value	Dilution multiple	IL-13（pg/ml）
Control	0.078	0.077	0.0775	0.0745	120.333	2	240.665
	0.07	0.074	0.072	0.069	111.379	2	222.758
	0.068	0.067	0.0675	0.0645	105.396	2	210.792
	0.068	0.06	0.064	0.061	99.4012	2	198.802
	0.093	0.09	0.0915	0.0885	141.127	2	282.253
	0.073	0.072	0.0725	0.0695	112.873	2	225.746
	0.099	0.095	0.097	0.094	148.52	2	297.041
pIgE	0.063	0.061	0.062	0.059	96.3997	2	192.799
	0.077	0.076	0.0765	0.0735	118.842	2	237.684
	0.089	0.094	0.0915	0.0885	141.127	2	282.253
	0.091	0.093	0.092	0.089	141.127	2	282.253
ArtCaM	0.066	0.071	0.0685	0.0655	106.893	2	213.785
	0.059	0.063	0.061	0.058	94.8978	2	189.796
	0.067	0.066	0.0665	0.0635	103.898	2	207.796
	0.072	0.069	0.0705	0.0675	109.884	2	219.769
	0.085	0.084	0.0845	0.0815	130.747	2	261.493
	0.084	0.082	0.083	0.08	127.775	2	255.549
	0.088	0.083	0.0855	0.0825	132.232	2	264.463
	0.078	0.078	0.078	0.075	120.333	2	240.665
	0.061	0.064	0.0625	0.0595	97.9008	2	195.802
	0.063	0.06	0.0615	0.0585	96.3997	2	192.799
	0.079	0.081	0.08	0.077	123.312	2	246.623
	0.06	0.063	0.0615	0.0585	96.3997	2	192.799
ArtCaM+pIgE	0.089	0.092	0.0905	0.0875	139.646	2	279.292
	0.076	0.081	0.0785	0.0755	121.822	2	243.645
	0.11	0.18	0.145	0.142	218.649	2	437.297
	0.085	0.089	0.087	0.084	133.716	2	267.432
	0.121	0.126	0.1235	0.1205	188.154	2	376.309
	0.092	0.09	0.091	0.088	139.646	2	279.292
	0.064	0.069	0.0665	0.0635	103.898	2	207.796
	0.085	0.084	0.0845	0.0815	130.747	2	261.493
	0.088	0.086	0.087	0.084	133.716	2	267.432
LPS	0.08	0.085	0.0825	0.0795	127.775	2	255.549
	0.085	0.086	0.0855	0.0825	132.232	2	264.463
	0.063	0.067	0.065	0.062	100.813	2	201.626

## Sheet: Fig4G
IL-17（pg/ml）
	OD1	OD2	average value	adjusted value	computed value	Dilution multiple	IL-17（pg/ml）
Control	0.036	0.038	0.037	0.018	0.592305	1.5	0.888458
	0.04	0.038	0.039	0.02	0.684465	1.5	1.0267
	0.041	0.04	0.0405	0.0215	0.753785	1.5	1.13068
	0.025	0.025	0.025	0.006	0.049881	1.5	0.0748215
	0.028	0.029	0.0285	0.0095	0.205241	1.5	0.307862
	0.03	0.03	0.03	0.011	0.272828	1.5	0.409242
pIgE	0.04	0.038	0.039	0.02	0.684465	1.5	1.0267
	0.029	0.028	0.0285	0.0095	0.205241	1.5	0.307862
	0.026	0.027	0.0265	0.0075	0.115918	1.5	0.173877
	0.031	0.03	0.0305	0.0115	0.295444	1.5	0.443166
ArtCaM	0.038	0.037	0.0375	0.0185	0.615314	1.5	0.922971
	0.051	0.053	0.052	0.033	1.28983	1.5	1.93475
	0.05	0.045	0.0475	0.0285	1.07921	1.5	1.61881
	0.036	0.033	0.0345	0.0155	0.477589	1.5	0.716383
	0.031	0.029	0.03	0.011	0.272828	1.5	0.409242
	0.05	0.051	0.0505	0.0315	1.21951	1.5	1.82927
	0.04	0.039	0.0395	0.0205	0.707553	1.5	1.06133
	0.056	0.054	0.055	0.036	1.43078	1.5	2.14617
	0.062	0.063	0.0625	0.0435	1.78482	1.5	2.67723
	0.038	0.036	0.037	0.018	0.592305	1.5	0.888458
	0.039	0.036	0.0375	0.0185	0.615314	1.5	0.922971
ArtCaM+pIgE	0.039	0.037	0.038	0.019	0.638345	1.5	0.957518
	0.029	0.03	0.0295	0.0105	0.250253	1.5	0.375379
	0.039	0.038	0.0385	0.0195	0.661395	1.5	0.992093
	0.028	0.029	0.0285	0.0095	0.205241	1.5	0.307862
	0.047	0.046	0.0465	0.0275	1.03254	1.5	1.54881
	0.025	0.027	0.026	0.007	0.093784	1.5	0.140676
	0.032	0.034	0.033	0.014	0.409058	1.5	0.613587
	0.029	0.031	0.03	0.011	0.272828	1.5	0.409242
	0.036	0.035	0.0355	0.0165	0.523406	1.5	0.785109
LPS	0.031	0.03	0.0305	0.0115	0.295444	1.5	0.443166
	0.031	0.029	0.0298	0.0108	0.264	1.5	0.396597
	0.031	0.03	0.0307	0.0117	0.3042	1.5	0.456353

## Sheet: Fig4H
IFN-γ (pg/ml)
	OD1	OD2	average value	adjusted value	computed value	Dilution multiple	IFN-γ (pg/ml)
Control	0.113	0.089	0.101	0.071	10.6145	3	31.8434
	0.07	0.066	0.068	0.038	3.57593	3	10.7278
	0.063	0.064	0.0635	0.0335	2.72381	3	8.17142
	0.058	0.051	0.0545	0.0245	0.807339	3	2.42202
	0.078	0.082	0.08	0.05	6.13364	3	18.4009
pIgE	0.087	0.079	0.083	0.053	6.77338	3	20.3201
	0.084	0.074	0.079	0.049	5.92042	3	17.7613
	0.09	0.082	0.086	0.056	7.41325	3	22.2397
	0.113	0.106	0.1095	0.0795	12.5367	3	37.6101
ArtCaM	0.396	0.43	0.413	0.383	77.9281	3	233.784
	1.822	1.826	1.824	1.794	402.136	3	1206.41
	0.871	0.89	0.8805	0.8505	181.65	3	544.95
	1.062	1.095	1.0785	1.0485	226.597	3	679.791
	0.102	0.117	0.1095	0.0795	12.5367	3	37.6101
	1.335	1.368	1.3515	1.3215	289.682	3	869.046
	1.592	1.573	1.5825	1.5525	344.124	3	1032.37
	1.931	1.938	1.9345	1.9045	429.091	3	1287.27
	1.821	1.972	1.8965	1.8665	419.796	3	1259.39
	0.439	0.465	0.452	0.422	86.4424	3	259.327
	1.077	1.08	1.0785	1.0485	226.597	3	679.791
ArtCaM+pIgE	0.397	0.405	0.401	0.371	75.3128	3	225.938
	0.248	0.225	0.2365	0.2065	39.7837	3	119.351
	0.115	0.117	0.116	0.086	13.8188	3	41.4565
	0.069	0.063	0.066	0.036	3.14984	3	9.44952
	0.342	0.357	0.3495	0.3195	64.2219	3	192.666
	0.051	0.059	0.055	0.025	0.807339	3	2.42202
	0.657	0.673	0.665	0.635	133.352	3	400.056
	0.103	0.097	0.1	0.07	10.401	3	31.2029
	0.177	0.171	0.174	0.144	26.2389	3	78.7166
LPS	0.557	0.527	0.542	0.512	106.178	3	318.535
	0.316	0.313	0.3145	0.2845	56.6327	3	169.898
	0.446	0.444	0.445	0.4148	84.8537	3	254.561

## Sheet: Elisa IgE
	OD1	OD2	OD3				IB	patients	OD1	OD2	OD3
PBS	0.053	0.065	0.044				-	patient1	0.11	0.111	0.109
PBS	0.042	0.0443	0.052				+	patient2	0.433	0.423	0.487
control1	0.075	0.078	0.069				+	patient3	0.558	0.547	0.578
control2	0.062	0.068	0.064				+	patient4	0.538	0.419	0.509
control3	0.08	0.078	0.077				+	patient5	0.393	0.326	0.313
control4	0.063	0.064	0.06				+	patient6	0.417	0.419	0.373
control5	0.081	0.083	0.08				-	patient7	0.071	0.114	0.059
control6	0.067	0.077	0.071				+	patient8	0.542	0.608	0.579
control7	0.065	0.056	0.052				-	patient9	0.062	0.078	0.696
control8	0.065	0.056	0.052				+	patient10	0.427	0.419	0.446
control9	0.071	0.067	0.073				+	patient11	0.542	0.508	0.545
control10	0.077	0.087	0.094				-	patient12	0.056	0.065	0.09
control11	0.08	0.076	0.078				+	patient13	0.445	0.508	0.447
control12	0.071	0.069	0.065				-	patient14	0.109	0.089	0.115
control13	0.052	0.057	0.053				-	patient15	0.073	0.067	0.089
control14	0.063	0.065	0.061				-	patient16	0.075	0.06	0.061
control15	0.071	0.069	0.078				-	patient17	0.073	0.067	0.089
							-	patient18	0.071	0.08	0.07
							-	patient19	0.073	0.06	0.056
							-	patient20	0.07	0.085	0.077
							-	patient21	0.076	0.065	0.09
							-	patient22	0.071	0.74	0.089
							-	patient23	0.073	0.085	0.106
							-	patient24	0.063	0.088	0.077
							-	patient25	0.056	0.065	0.06
							-	patient26	0.076	0.078	0.098
							-	patient27	0.122	0.113	0.098
							+	patient28	0.099	0.117	0.077
							-	patient29	0.06	0.064	0.053
							-	patient30	0.053	0.05	0.068
							-	patient31	0.064	0.063	0.08
							+	patient32	0.424	0.365	0.331
							-	patient33	0.171	0.123	0.106
							-	patient34	0.112	0.117	0.127
							-	patient35	0.155	0.107	0.145
							-	patient36	0.296	0.225	0.215
							-	patient37	0.132	0.167	0.196
							+	patient38	0.507	0.458	0.441
							+	patient39	0.541	0.526	0.502
							-	patient40	0.225	0.237	0.242
							+	patient41	0.307	0.278	0.311
							-	patient42	0.246	0.218	0.256
							-	patient43	0.257	0.261	0.243
							-	patient44	0.216	0.219	0.23
							+	patient45	0.477	0.509	0.458
							+	patient46	0.391	0.463	0.436
							+	patient47	0.594	0.576	0.617
							-	patient48	0.253	0.113	0.107
							-	patient49	0.216	0.219	0.23
							+	patient50	0.394	0.407	0.45
							-	patient51	0.284	0.277	0.287
							-	patient52	0.161	0.203	0.132
							-	patient53	0.121	0.233	0.153
							-	patient54	0.153	0.113	0.107
							-	patient55	0.071	0.082	0.075
							-	patient56	0.077	0.056	0.065
							-	patient57	0.123	0.106	0.112
							-	patient58	0.159	0.19	0.161
							-	patient59	0.174	0.169	0.124
							-	patient60	0.133	0.187	0.149
							-	patient61	0.109	0.158	0.121
							-	patient62	0.113	0.107	0.131
							-	patient63	0.225	0.237	0.242
							-	patient64	0.117	0.127	0.159
							-	patient65	0.253	0.253	0.233
							-	patient66	0.146	0.122	0.148
							-	patient67	0.189	0.117	0.081
							+	patient68	0.708	0.738	0.674
							+	patient69	0.526	0.502	0.543
							-	patient70	0.126	0.102	0.243
							+	patient71	0.936	1.685	1.022
							-	patient72	0.103	0.132	0.167
							-	patient73	0.203	0.113	0.107
							-	patient74	0.153	0.153	0.233
							-	patient75	0.157	0.161	0.143
							-	patient76	0.196	0.225	0.155
							+	patient77	0.438	0.502	0.408

[truncated: 1 more sheets: Table S6]
